# Supplementary material for: Stacking-induced broadband near-infrared absorption beyond 2500 nm and deep-red phosphorescence from purely organic radicals
Source: Royal Society of Chemistry journal article supplement (doi:10.1039/c3tc30438h), 2013-01-01
Supplement: c3tc30438h.pdf [file c3tc30438h.pdf]

## Electronic Supplementary Information

### Stacking-induced broadband near-infrared absorption beyond 2500 nm and deep-red phosphorescence from purely organic radicals

Guo-Ping Yong,\* Yu-Mei Zhao, Ya Feng, and Xue-Rui Zhang

Department of Chemistry, University of Science and Technology of China, Hefei 230026, P. R. China

E-mail: [gpyong@ustc.edu.cn](mailto:gpyong@ustc.edu.cn)

#### Materials and physical measurements:

All reagents were commercially available and used without further purification. The FT-IR spectra (KBr disk, 4000–400  $\text{cm}^{-1}$ ) were recorded on a Bruker EQUINOX55 FT-IR spectrophotometer. High-resolution mass spectra (HRMS) were obtained on Micromass GCT-MS instrument operating in electron impact (EI) mode and time of flight (TOF) mass detector. The solution ( $10^{-4}$  M DMF) and solid-state UV/Vis/NIR absorption spectra were recorded at room temperature on a DUV-3700 UV/vis/NIR spectrometer. The solution ( $10^{-4}$  M DMF) photoluminescence (PL) spectra, and solid-state PL spectra and the decay lifetimes were determined at room temperature on a Fluorolog-3-TAU fluorescence spectrophotometer. The solid-state quantum yields were measured also on a Fluorolog-3-TAU fluorescence spectrophotometer equipped with a  $\text{BaSO}_4$ -coated integrating sphere. The quantum yields of solution state were measured at room temperature in a  $10^{-4}$  M DMF solution using quinine sulfate ( $\Phi = 0.54$ ) as a reference. Corrections were made due to the change in solvent refractive indices.<sup>S1</sup> The EPR spectra were recorded on a JES-FA 200 ESR spectrometer at X-band. Thermogravimetric analyses were performed under  $\text{N}_2$  atmosphere with a heating rate of  $10\text{ }^\circ\text{C min}^{-1}$  with a Shimadzu TGA-50H thermogravimetric analyzer.

The X-ray diffraction measurements were performed on a Gemini S Ultra CCD diffractometer (Oxford diffraction Ltd.) using graphite monochromated Cu-K $\alpha$  radiation ( $\lambda = 1.54184\text{ \AA}$ ). The structures were solved by direct method (SHELXL 97) and completed by difference Fourier method (SHELXL 97). Refinement was performed against  $F^2$  by weighted full-matrix least-squares (SHELXL 97), and empirical absorption correction (SCALE3 ABSPACK) was applied. All non-hydrogen atoms were refined with anisotropic displacement parameters. The C–H hydrogen atoms were placed in geometrically calculated positions; the N–H and O–H hydrogen atoms were located in the difference Fourier map and kept fixed in that position. Weighted  $R$  factor ( $R_w$ ) and all goodness of fit  $S$  are based on  $F^2$ , conventional  $R$  factor ( $R$ ) is based on  $F$ .

#### Synthesis of 3-formyl-2,3'-biimidazo[1,2-*a*]pyridin-2'-one derivatives 1 and 2:

3-Formyl-2,3'-biimidazo[1,2-*a*]pyridin-2'-one (Hfbipo<sup>-</sup>) was synthesized according to previous procedure.<sup>S2</sup> KOH (2.24 g, 40 mmol) were added into 25 mL ethanol containing Hfbipo<sup>-</sup> (0.556 g, 2 mmol), and then acetophenone (1.4 mL, 10 mmol) was added. The reaction mixture was stirred at room temperature for 12 h, giving rise to the deep-green viscous solution, which was poured into 200 mL of water. The resulting deep-green suspension solution was acidified to pH 7 by acetic acid, leading to the orange suspension solution. After filtrated and washed with water, recrystallization of solid from DMF/H<sub>2</sub>O (v/v, 2:1) afforded orange solid of **1**. Yield: 0.68 g (1.79 mmol, 89.5 %). IR (KBr, cm<sup>-1</sup>): 3425(vs), 1647(vs), 1610(vs), 1556(s), 1518(s), 1487(s), 1353(m), 1335(m), 1282(s), 1245(m), 1218(s), 1175(m), 1110(w), 1040(m), 1014(m), 964(w), 890(w), 842(w), 811(w), 743(s), 697(m). HRMS (EI, m/z, [M]<sup>+</sup>): Calc. for C<sub>23</sub>H<sub>16</sub>N<sub>4</sub>O<sub>2</sub>: 380.25, Found: 380.

KOH (2.24 g, 40 mmol) were added into 25 mL ethanol containing Hfbipo<sup>-</sup> (0.556 g, 2 mmol), and then 4-acetylpyridine (0.60 g, 5 mmol) was added. The reaction mixture was stirred at room temperature for 8 h, giving rise to the brown viscous solution, which was poured into 200 mL of water. The resulting brown suspension solution was acidified to pH 7 by acetic acid, leading to the red suspension solution. After filtrated and washed with water, recrystallization of solid from DMF/H<sub>2</sub>O (v/v, 5:3) afforded red solid of **2**. Yield: 0.36 g (0.94 mmol, 47.0 %). IR (KBr, cm<sup>-1</sup>): 3319(vs), 1650(vs), 1609(vs), 1562(m), 1519(s), 1487(m), 1359(m), 1337(w), 1286(s), 1243(s), 1228(s), 1050(w), 957(m), 805(w), 751(m), 698(w), 646(w), 610(m). HRMS (EI, m/z, [M]<sup>+</sup>): Calc. for C<sub>22</sub>H<sub>15</sub>N<sub>5</sub>O<sub>2</sub>: 381.28, Found: 381.

Orange block crystals of **1**•2(H<sub>2</sub>O) and red block crystals of **2**•2(H<sub>2</sub>O) suitable for X-ray diffraction analysis were obtained by slowly decreasing temperature (from 65 °C to room temperature) during recrystallization procedure.

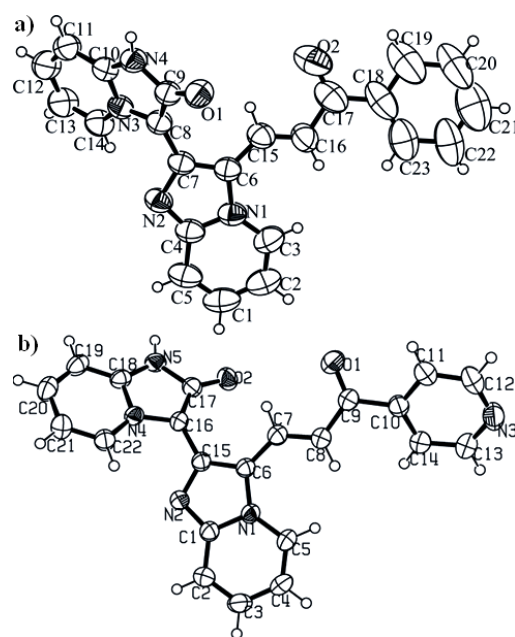

**Fig. S1** ORTEP drawing of molecular structures of **1**(a) and **2** (b) with ellipsoids drawn at 50% probability.

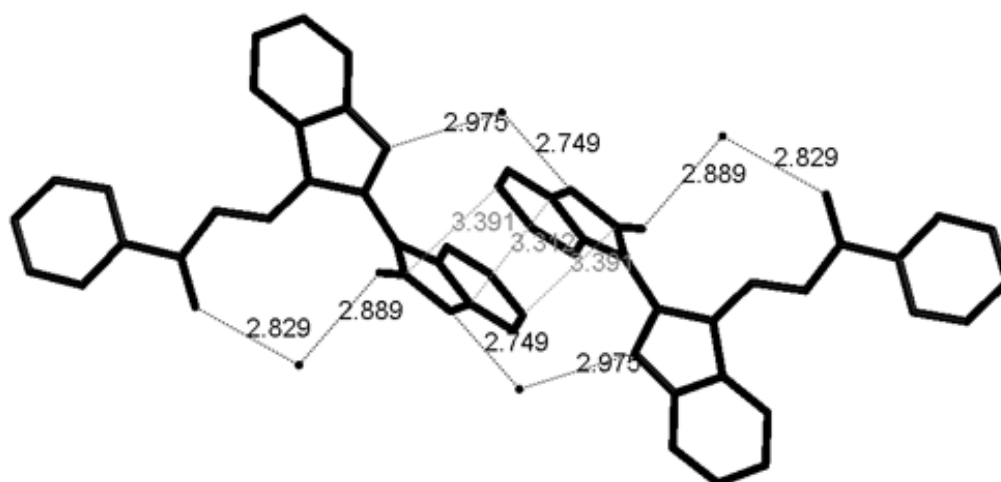

**Fig. S2** The dimer structure of **2** formed by the hydrogen bonds (black dashed lines) and intermolecular  $\pi$ - $\pi$  interactions (grey dashed lines).

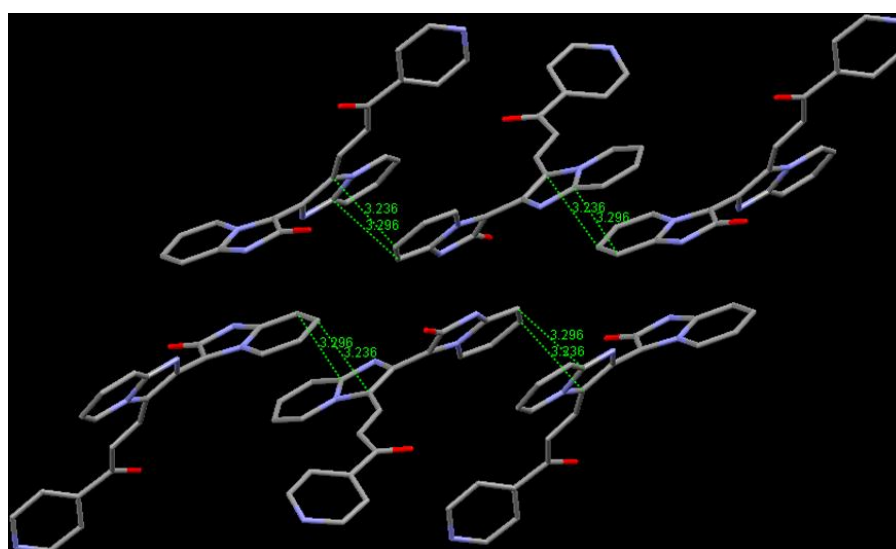

**Fig. S3** 1D chain structure of **2** formed by intermolecular close contacts.

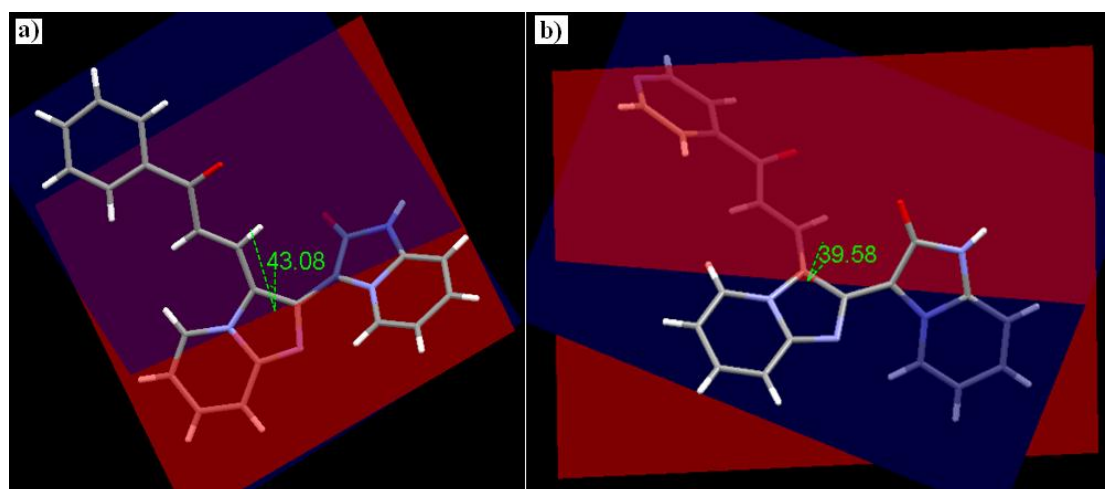

**Fig. S4** Dihedral angle between two imidazo[1,2-*a*]pyridine rings for **1** (a) and **2** (b).

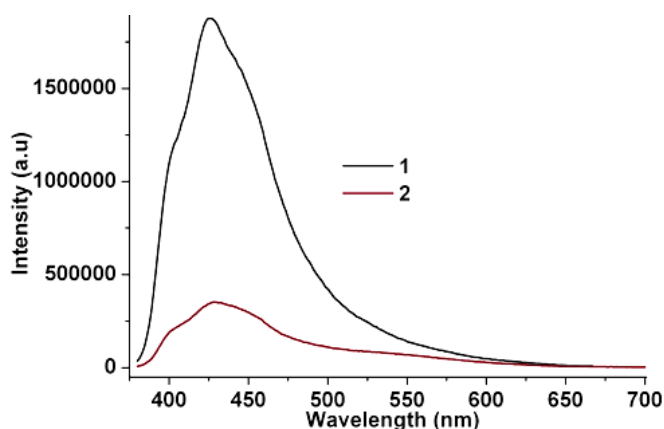

**Fig. S5** Room-temperature PL spectra of **1** and **2** in  $10^{-4}$  M DMF solution, upon excitation at 365 nm.

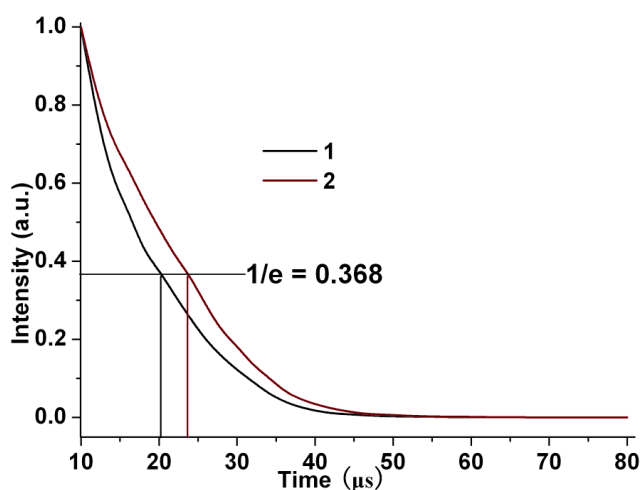

**Fig. S6** The decay lifetime curves of **1** and **2** at emission peak of 583 and 665 nm, respectively in the solid state. The lifetime ( $\tau$ ) is defined as the time in which the emission intensity decays to  $1/e$  of the initial intensity ( $I_0$ ), where  $e$  is the natural log constant and is equal to 2.718. ( $I = I_0 e^{-(t/\tau)} \Rightarrow \tau = t \Rightarrow I = (1/e) I_0$ ).<sup>S3</sup>

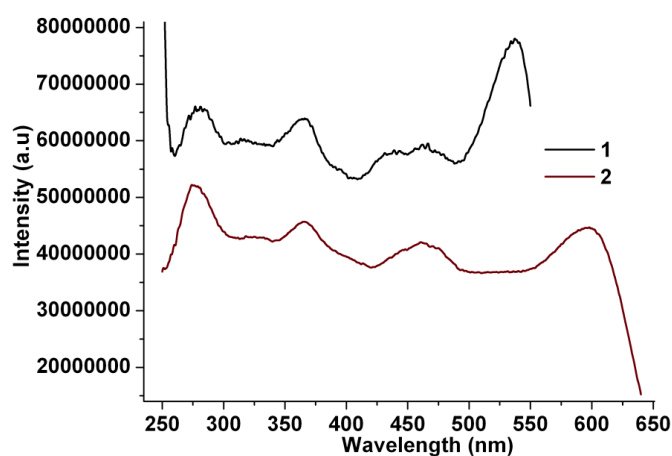

**Fig. S7** Room-temperature solid-state excitation spectra of **1** and **2** under emission wavelengths of 583 and 665 nm, respectively.

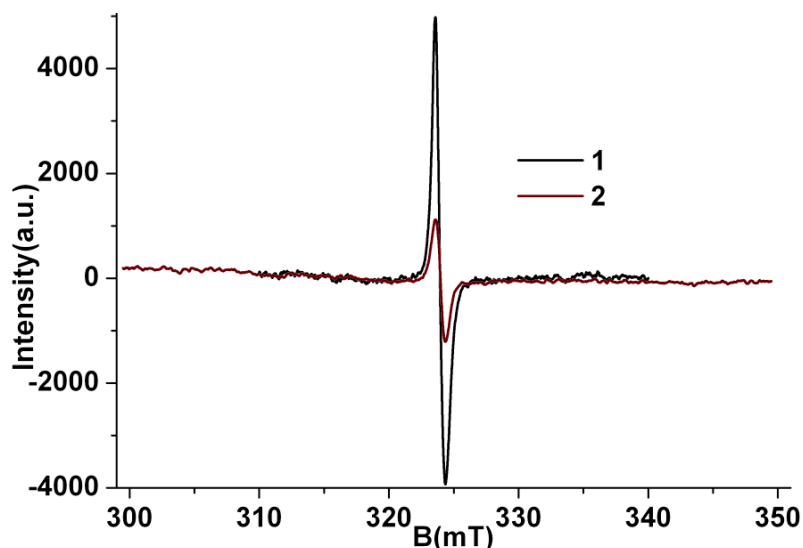

**Fig. S8** Solid-state EPR spectra of **1** and **2** at room temperature.

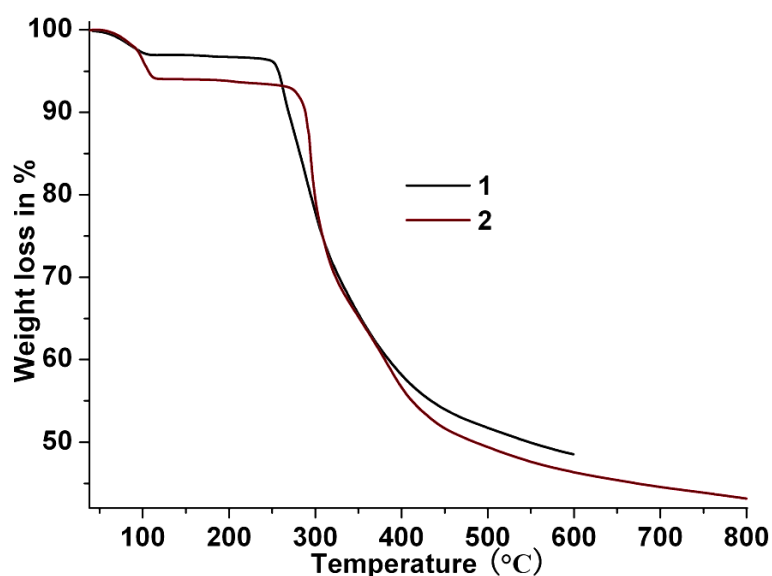

**Fig. S9** TGA curves of **1** and **2**.

Because one guest water molecule only forms weak hydrogen bonds with **1** ( $C23 \cdots O4 (H_2O) = 3.093 \text{ \AA}$  and  $C3 \cdots O4 = 2.989 \text{ \AA}$ ), as described in crystal structure, this water molecule could easily be lost. As a result, TGA curve of microcrystal sample of **1** only reveals the loss of one guest water molecule, however, microcrystal sample of **2** exhibits the loss of two guest water molecules from TGA curve which is consistent with crystal structure.

#### Reference

- S1 C. F. Li, G. P. Yong and Y. Z. Li, *Inorg. Chem. Commun.*, 2010, **13**, 179–182.  
S2 Y. Z. Li, G. P. Yong, Y. M. Zhang, C. F. Li and W. L. She, *Synth. Met.*, 2011, **161**, 713–717.  
S3 K. C. Stylianou, R. Heck, S.Y. Chong, J. Bacsá, J. T. A. Jones, Y. Z. Khimyak, D. Bradshaw and M. J. Rosseinsky, *J. Am. Chem. Soc.*, 2010, **132**, 4119–4130.
